# Supplementary material for: The predictive value of serum level of cystatin C for COVID-19 severity
Source: PubMed Central journal article supplement (PMC8578213; doi:10.1038/s41598-021-01570-2), 2021-11-09
Supplement: 41598_2021_1570_MOESM1_ESM.pdf [file 41598_2021_1570_MOESM1_ESM.pdf]

**Title: The predictive value of serum level of cystatin C for COVID-19 severity**

Luanfeng Lin, M.D., Xiaoling Chen, M.D., Junnian Chen, M.D., Xiaobin Pan, M.D.<sup>4</sup>,  
Pincang Xia, M.D.<sup>5</sup>, Hailong Lin, M.D.<sup>6</sup>, Houwei Du, M.D.<sup>7,8\*</sup>

**Supplementary materials**

Supplementary figure 1: Distribution of the sCys C, Creatinine, and Bun values in severe and non-severe COVID-19 patients

**Fig S1a**

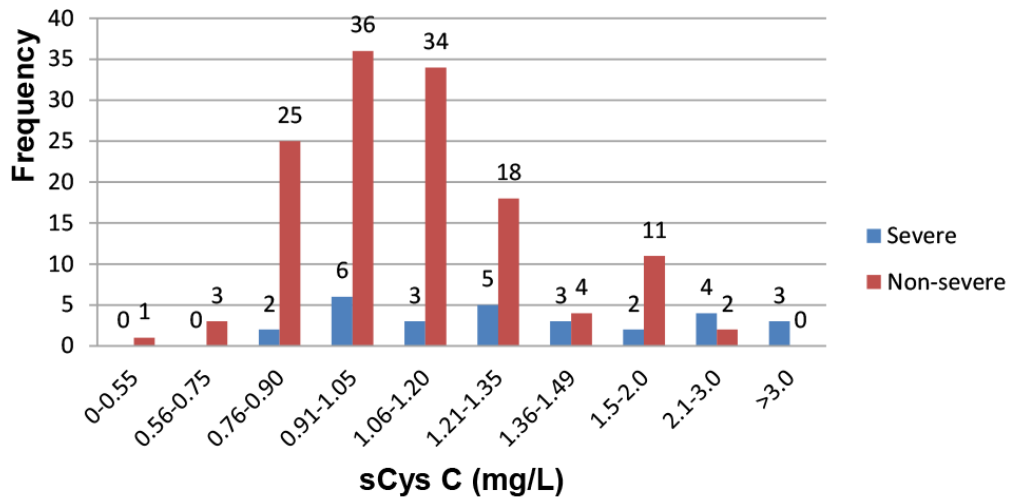

**Fig S1b**

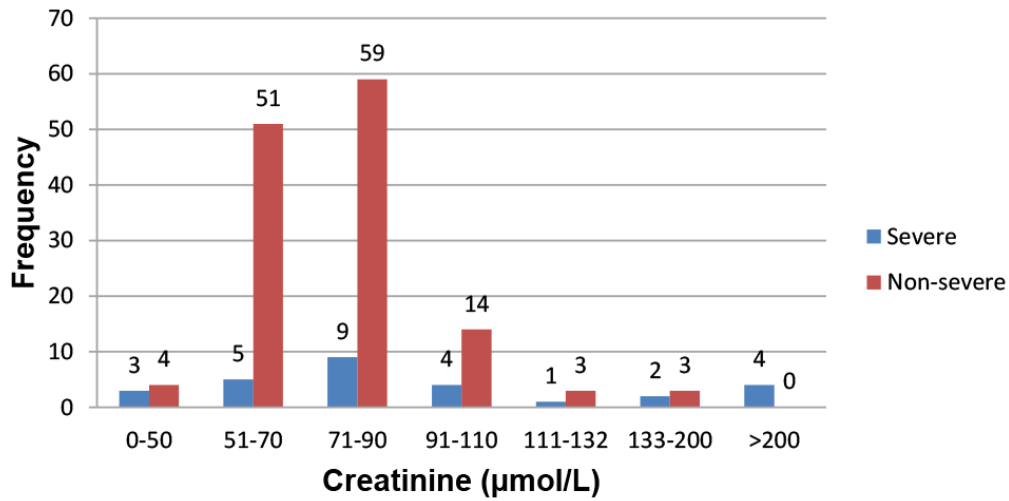

**Fig S1c**

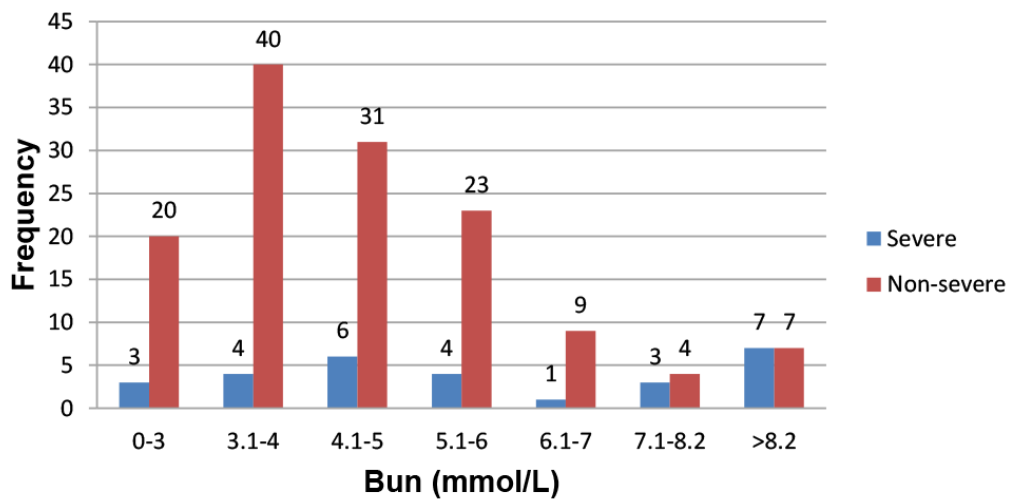

**Supplementary figure 1: Distribution of the sCys C, Creatinine, and Bun values in severe and non-severe COVID-19 patients**

Figure legend: 1a: Distribution of the sCys C levels in severe and non-severe COVID-19 patients; 1b: Distribution of serum creatinine levels in severe and non-severe COVID-19 patients; 1c: Distribution of serum Bun levels in severe and non-severe COVID-19 patients

Abbreviations: COVID-19 = coronavirus disease 2019, sCys C = serum cystatin C, Bun = blood urea nitrogen
